# Supplementary material for: Communities of Fungi in Black Cherry Stumps and Effects of Herbicide
Source: PubMed Central journal article supplement (PMC7570310; doi:10.3390/plants9091126), 2020-08-31

**Table S1.** Taxa of fungi occurring in black cherry stumps in relation to sample time, stump diameter and glyphosate treatment.

| Taxon                                                                                                                | Order             | Similarity of the reference sequence | Frequency in the fungal community (%) |           |              |           |                    |           |              |           |   |       |   |
|----------------------------------------------------------------------------------------------------------------------|-------------------|--------------------------------------|---------------------------------------|-----------|--------------|-----------|--------------------|-----------|--------------|-----------|---|-------|---|
|                                                                                                                      |                   |                                      | May stumps                            |           |              |           | July–August stumps |           |              |           |   |       |   |
|                                                                                                                      |                   |                                      | < 5 cm diam.                          |           | > 5 cm diam. |           | < 5 cm diam.       |           | > 5 cm diam. |           |   |       |   |
|                                                                                                                      |                   |                                      | Treated                               | Untreated | Treated      | Untreated | Treated            | Untreated | Treated      | Untreated |   |       |   |
| <b>Glomeromycota</b>                                                                                                 |                   |                                      |                                       |           |              |           |                    |           |              |           |   |       |   |
| <i>Glomeraceae</i> sp.                                                                                               | Glomerales        | 99%                                  | 0                                     | 0.082     | 0            | 0         | 0                  | 0         | 0            | 0         | 0 | 0     | 0 |
| <b>Zygomycota</b>                                                                                                    |                   |                                      |                                       |           |              |           |                    |           |              |           |   |       |   |
| <i>Absidia cylindrospora</i>                                                                                         | Mucorales         | 98%                                  | 0                                     | 0         | 0            | 0         | 0                  | 0.011     | 0            | 0         | 0 | 0     | 0 |
| <i>Mortierella hyalina</i>                                                                                           | Mortierellales    | 100%                                 | 0                                     | 0.37      | 0            | 0         | 0                  | 0         | 0            | 0         | 0 | 0     | 0 |
| Mortierellaceae                                                                                                      | Mortierellales    | 97%                                  | 0                                     | 0         | 0.013        | 0         | 0                  | 0.011     | 0.012        | 0         | 0 | 0     | 0 |
| <i>Mucor bainieri</i>                                                                                                | Mucorales         | 99%                                  | 0                                     | 0         | 0.235        | 0         | 0                  | 0         | 0            | 0         | 0 | 0     | 0 |
| <i>Umbelopsis isabellina</i>                                                                                         | Umbelopsidales    | 100%                                 | 0.023                                 | 0.247     | 0.091        | 0.485     | 0.019              | 0         | 0            | 0         | 0 | 0.087 | 0 |
| <b>Ascomycota</b>                                                                                                    |                   |                                      |                                       |           |              |           |                    |           |              |           |   |       |   |
| <i>Absconditella</i> sp.                                                                                             | Ostropales        | 98%                                  | 0.023                                 | 0         | 0.013        | 0.017     | 0.019              | 0.021     | 0            | 0         | 0 | 0     | 0 |
| <i>Acephala applanata</i>                                                                                            | Helotiales        | 100%                                 | 0                                     | 0.123     | 0            | 0         | 0                  | 0         | 1.023        | 0.056     | 0 | 0     | 0 |
| <i>Acremonium fusidioides</i> + <i>Acremonium</i> spp.                                                               | Hypocreales       | 99–100%                              | 0.023                                 | 0         | 0.339        | 0         | 0                  | 0.064     | 0            | 0.068     | 0 | 0.068 | 0 |
| <i>Adiscisco tricellulare</i>                                                                                        | Xylariales        | 97%                                  | 0.046                                 | 0         | 0.013        | 0         | 0.038              | 0.129     | 0            | 0.006     | 0 | 0.006 | 0 |
| <i>Agonimia</i> sp.                                                                                                  | Verrucariales     | 98%                                  | 0.069                                 | 0         | 0.013        | 0         | 0.114              | 0.441     | 0            | 0         | 0 | 0     | 0 |
| <i>Alatospora acuminata</i> + <i>Alatospora</i> sp.                                                                  | Leotiales         | 99–100%                              | 0                                     | 0         | 0.013        | 0.017     | 0                  | 0         | 0            | 0.043     | 0 | 0.043 | 0 |
| <i>Arthrobotrys foliicola</i>                                                                                        | Orbiliiales       | 99%                                  | 0                                     | 0         | 0.091        | 0         | 0.038              | 0.032     | 0            | 0         | 0 | 0     | 0 |
| <i>Articulospora</i> sp.                                                                                             | Orbiliiales       | 99%                                  | 0                                     | 0         | 0            | 0.017     | 0.398              | 0.527     | 0.062        | 0.124     | 0 | 0.124 | 0 |
| Ascomycota                                                                                                           |                   | 100%                                 | 3.84                                  | 12.58     | 35.32        | 16.00     | 4.26               | 2.43      | 22.18        | 2.56      | 0 | 2.56  | 0 |
| <i>Barbatosphaeria arboricola</i> + <i>B. barbirostris</i> + <i>B. dryina</i> + <i>B. neglecta</i>                   | Incertae sedis    | 97–99%                               | 0.092                                 | 0         | 1.134        | 0         | 0.038              | 0         | 0.062        | 0.647     | 0 | 0.647 | 0 |
| <i>Barssia maroccana</i>                                                                                             | Pezizales         | 98%                                  | 0                                     | 0.123     | 0            | 0         | 0                  | 0         | 0.469        | 0         | 0 | 0     | 0 |
| <i>Beauveria pseudobassiana</i>                                                                                      | Hypocreales       | 100%                                 | 0.116                                 | 0.082     | 0            | 0.104     | 0.057              | 0.247     | 0.025        | 0.006     | 0 | 0.006 | 0 |
| <i>Biatora sphaeroidiza</i>                                                                                          | Lecanorales       | 100%                                 | 0                                     | 0         | 0            | 1.369     | 0                  | 0.011     | 0.16         | 0.411     | 0 | 0.411 | 0 |
| Bionectriaceae                                                                                                       | Hypocreales       | 100%                                 | 0.023                                 | 0         | 0            | 0.017     | 0                  | 0         | 0            | 0         | 0 | 0     | 0 |
| <i>Blastobotrys</i> sp.                                                                                              | Saccharomycetales | 100%                                 | 0.046                                 | 2.015     | 0            | 0         | 0                  | 0         | 0            | 0         | 0 | 0     | 0 |
| <i>Cadophora finlandica</i> + <i>C. gregat</i> + <i>C. luteo-olivacea</i> + <i>C. melinii</i> + <i>Cadophora</i> sp. | Helotiales        | 99–100%                              | 0.138                                 | 0         | 0            | 0.087     | 0.266              | 0.161     | 0.234        | 2.357     | 0 | 2.357 | 0 |
| <i>Caliciopsis beckhausii</i>                                                                                        | Coryneliales      | 99%                                  | 0                                     | 0         | 0.065        | 0.052     | 0                  | 0         | 0            | 0         | 0 | 0     | 0 |
| <i>Candida fructus</i> + <i>C. mycetangii</i> + <i>C. sake</i> + <i>Candida</i> sp.                                  | Saccharomycetales | 99–100%                              | 0.092                                 | 1.974     | 0            | 1.473     | 0.076              | 0         | 0.049        | 0.006     | 0 | 0.006 | 0 |
| <i>Capronia epimyces</i> + <i>C. pilosella</i> + <i>C. pulcherrima</i> + <i>Capronia</i> sp.                         | Chaetothyriales   | 99–100%                              | 0.763                                 | 0         | 0.743        | 0.087     | 0.076              | 0         | 0.296        | 0.137     | 0 | 0.137 | 0 |
| <i>Cephaliophora longispora</i>                                                                                      | Pezizales         | 97%                                  | 0                                     | 0         | 0            | 0         | 0                  | 0         | 0.16         | 0         | 0 | 0     | 0 |
| <i>Cephalosporium</i> spp.                                                                                           | Pezizales         | 98%                                  | 0.046                                 | 0         | 0.013        | 0.017     | 0.151              | 0         | 0.148        | 0.006     | 0 | 0.006 | 0 |

| Taxon                                                                                                                                                                                          | Order             | Similarity of the reference sequence | Frequency in the fungal community (%) |           |              |           |                    |           |              |           |
|------------------------------------------------------------------------------------------------------------------------------------------------------------------------------------------------|-------------------|--------------------------------------|---------------------------------------|-----------|--------------|-----------|--------------------|-----------|--------------|-----------|
|                                                                                                                                                                                                |                   |                                      | May stumps                            |           |              |           | July–August stumps |           |              |           |
|                                                                                                                                                                                                |                   |                                      | < 5 cm diam.                          |           | > 5 cm diam. |           | < 5 cm diam.       |           | > 5 cm diam. |           |
|                                                                                                                                                                                                |                   |                                      | Treated                               | Untreated | Treated      | Untreated | Treated            | Untreated | Treated      | Untreated |
| Cephalothecaceae                                                                                                                                                                               | Sordariales       | 98%                                  | 0.578                                 | 0.082     | 0.482        | 0.503     | 0                  | 0.107     | 0.074        | 0.019     |
| <i>Chaetomium</i> sp.                                                                                                                                                                          | Sordariales       | 98%                                  | 0.023                                 | 0         | 0            | 0.017     | 0.095              | 0         | 0            | 0         |
| <i>Chaetosphaeria myriocarpa</i> + <i>Ch. rivularia</i>                                                                                                                                        | Chaetosphaeriales | 98–99%                               | 0.023                                 | 0         | 0            | 0         | 0                  | 0.021     | 0.049        | 0.05      |
| Chaetothyriales                                                                                                                                                                                | Chaetothyriales   | 100%                                 | 2.035                                 | 0         | 0.678        | 0.589     | 1.003              | 1.172     | 0.863        | 0.1       |
| <i>Chalara pseudoaffinis</i> + <i>Chalara</i> sp.                                                                                                                                              | Microascales      | 99–100%                              | 0                                     | 0.041     | 0            | 0.017     | 0.928              | 0.086     | 0            | 0         |
| <i>Chloridium</i> sp.                                                                                                                                                                          | Chaetosphaeriales | 100%                                 | 0.023                                 | 0.123     | 0            | 0         | 0                  | 0         | 0            | 0         |
| <i>Ciborinia candolleana</i>                                                                                                                                                                   | Helotiales        | 98%                                  | 0                                     | 0.041     | 0            | 0.017     | 0.038              | 0.107     | 0.012        | 0.006     |
| <i>Ciliophora</i> sp.                                                                                                                                                                          | Incertae sedis    | 100%                                 | 0.116                                 | 0.123     | 0.365        | 0         | 0.189              | 0.011     | 0            | 0         |
| <i>Cistella</i> sp.                                                                                                                                                                            | Helotiales        | 100%                                 | 0                                     | 0         | 0.013        | 0         | 0                  | 0         | 0            | 0         |
| <i>Cladobotryum paravirescens</i>                                                                                                                                                              | Hypocreales       | 100%                                 | 0.023                                 | 0         | 0            | 0         | 0                  | 0         | 0            | 0         |
| <i>Cladophialophora</i> sp. + <i>C. chaetospira</i> + <i>C. arxii</i>                                                                                                                          | Chaetothyriales   | 98–100%                              | 1.087                                 | 0         | 0.182        | 0.364     | 0.852              | 0.656     | 0.925        | 0.46      |
| <i>Claussenomyces</i> sp.                                                                                                                                                                      | Phacidiales       | 99%                                  | 0                                     | 0         | 0.026        | 0.017     | 0                  | 0         | 0.111        | 0         |
| <i>Colletotrichum antirrhinicola</i> + <i>C. godetiae</i> + <i>C. tamarilloi</i>                                                                                                               | Incertae sedis    | 99–100%                              | 0.092                                 | 0         | 0            | 0         | 0.435              | 1.763     | 0.024        | 0.006     |
| <i>Collophora</i> sp. + <i>C. paarla</i>                                                                                                                                                       | Incertae sedis    | 98–99%                               | 0.023                                 | 0         | 0.078        | 0.104     | 0.076              | 0         | 0.308        | 0.069     |
| <i>Colpoma quercinum</i>                                                                                                                                                                       | Rhytismales       | 98%                                  | 0                                     | 0         | 0            | 0.017     | 0                  | 0         | 0            | 0         |
| <i>Coniochaeta</i> sp. + <i>C. lignicola</i> + <i>C. fodinicola</i>                                                                                                                            | Coniochaetales    | 98–99%                               | 0.717                                 | 0         | 2.854        | 0.121     | 0.189              | 0.011     | 0.358        | 0.33      |
| Coniochaetaceae                                                                                                                                                                                | Coniochaetales    | 98%                                  | 0                                     | 0         | 0            | 0         | 0                  | 0         | 0.012        | 0         |
| Coniochaetales                                                                                                                                                                                 | Coniochaetales    | 97%                                  | 0.023                                 | 0         | 0.013        | 0         | 0                  | 0.011     | 0.025        | 0.012     |
| <i>Crocicreas epicalamia</i> + <i>Crocicreas</i> sp.                                                                                                                                           | Helotiales        | 99–100%                              | 0.023                                 | 0.206     | 0.013        | 0.017     | 0.038              | 5.493     | 0.481        | 0.025     |
| <i>Cyphellophora reptans</i>                                                                                                                                                                   | Chaetothyriales   | 99%                                  | 0                                     | 0         | 0.013        | 0.191     | 0                  | 0         | 0            | 0         |
| <i>Dendrophoma cytisporoides</i>                                                                                                                                                               | Incertae sedis    | 100%                                 | 0.023                                 | 0         | 0            | 0         | 0                  | 1.666     | 0            | 0         |
| Dermateaceae                                                                                                                                                                                   | Helotiales        | 99%                                  | 0.023                                 | 0.206     | 0.013        | 0.052     | 0                  | 0.161     | 0            | 0         |
| <i>Desertella</i> sp.                                                                                                                                                                          | Incertae sedis    | 100%                                 | 0.023                                 | 0         | 0.065        | 0.156     | 0.057              | 0.247     | 0.012        | 0.006     |
| <i>Diaporthe cotoneastri</i> + <i>D. cynaroidis</i> + <i>D. helicis</i>                                                                                                                        | Diaporthales      | 99–100%                              | 0.139                                 | 0         | 0.013        | 0.035     | 6.039              | 17.274    | 0.173        | 0.087     |
| <i>Dictyoachaeta</i> sp.                                                                                                                                                                       | Chaetosphaeriales | 99%                                  | 0                                     | 0.164     | 0            | 0.017     | 0.019              | 13.834    | 0            | 0.1       |
| <i>Discosia pseudoartocreas</i>                                                                                                                                                                | Incertae sedis    | 99%                                  | 0.069                                 | 0         | 0            | 0.069     | 0                  | 0.484     | 0            | 0         |
| <i>Discostroma</i> sp.                                                                                                                                                                         | Xylariales        | 99%                                  | 0                                     | 0         | 0            | 0.069     | 0                  | 0.011     | 0            | 0         |
| <i>Exophiala bergeri</i> + <i>E. capensis</i> + <i>E. castellanii</i> + <i>E. lecanii-corni</i> + <i>E. opportunistica</i> + <i>E. sideris</i> + <i>E. psychrophila</i> + <i>Exophiala</i> sp. | Chaetothyriales   | 99–100%                              | 0.947                                 | 0         | 1.121        | 1.005     | 0.493              | 0.398     | 0.999        | 0.859     |
| <i>Fusarium oxysporum</i> + <i>F. cyanostomum</i> + <i>Fusarium</i> sp.                                                                                                                        | Hypocreales       | 99–100%                              | 0.046                                 | 0         | 0.013        | 0.104     | 0.057              | 0.032     | 0.024        | 0         |
| <i>Fusicladium cordae</i>                                                                                                                                                                      | Pleosporales      | 100%                                 | 0                                     | 0         | 0            | 0.017     | 0                  | 0         | 0            | 0         |
| <i>Geomyces auratus</i>                                                                                                                                                                        | Helotiales        | 98%                                  | 0                                     | 0         | 0            | 0.035     | 0.019              | 0         | 0            | 0         |
| <i>Gnomoniopsis paraclavulata</i>                                                                                                                                                              | Diaporthales      | 100%                                 | 0.023                                 | 0         | 0            | 0         | 0                  | 0.075     | 0            | 0.006     |
| <i>Haloguignardia irritans</i>                                                                                                                                                                 | Lulworthiales     | 100%                                 | 0                                     | 0         | 0            | 0         | 0.909              | 0         | 0            | 0         |



| Taxon                                                                                                                                                                                                                              | Order             | Similarity of the reference sequence | Frequency in the fungal community (%) |           |              |           |                    |           |              |           |
|------------------------------------------------------------------------------------------------------------------------------------------------------------------------------------------------------------------------------------|-------------------|--------------------------------------|---------------------------------------|-----------|--------------|-----------|--------------------|-----------|--------------|-----------|
|                                                                                                                                                                                                                                    |                   |                                      | May stumps                            |           |              |           | July–August stumps |           |              |           |
|                                                                                                                                                                                                                                    |                   |                                      | < 5 cm diam.                          |           | > 5 cm diam. |           | < 5 cm diam.       |           | > 5 cm diam. |           |
|                                                                                                                                                                                                                                    |                   |                                      | Treated                               | Untreated | Treated      | Untreated | Treated            | Untreated | Treated      | Untreated |
| <i>Massaria parva</i>                                                                                                                                                                                                              | Pleosporales      | 99%                                  | 0                                     | 0         | 0            | 0         | 0                  | 0         | 0            | 0.019     |
| <i>Meliniomyces</i> sp.                                                                                                                                                                                                            | Incertae sedis    | 99%                                  | 0                                     | 0         | 0.104        | 0         | 0                  | 0         | 0.037        | 0.367     |
| <i>Meliniomyces variabilis</i>                                                                                                                                                                                                     | Incertae sedis    | 99%                                  | 0                                     | 0         | 0.013        | 0         | 0                  | 0.011     | 0            | 0.019     |
| <i>Menispora ciliata</i> + <i>M. manitobaensis</i>                                                                                                                                                                                 | Chaetosphaeriales | 99–100%                              | 0.023                                 | 0         | 0            | 0.156     | 0.038              | 0.064     | 0.012        | 0.006     |
| <i>Metapochonia bulbilosa</i>                                                                                                                                                                                                      | Hypocreales       | 99%                                  | 0                                     | 0         | 0            | 0.087     | 0.038              | 0         | 0.037        | 0.012     |
| <i>Micarea assimilata</i> + <i>M. leprosula</i>                                                                                                                                                                                    | Lecanorales       | 99–100%                              | 0.162                                 | 0         | 0.117        | 0.017     | 0.095              | 0.075     | 0.037        | 0         |
| <i>Mollisia cinerea</i> + <i>Mollisia</i> sp.                                                                                                                                                                                      | Helotiales        | 99–100%                              | 52.27                                 | 0.00      | 0.51         | 0.02      | 1.59               | 0.00      | 0.76         | 3.41      |
| <i>Mycofalcella calcarata</i>                                                                                                                                                                                                      | Incertae sedis    | 100%                                 | 0.023                                 | 0         | 0            | 0         | 0                  | 0         | 0            | 0         |
| <i>Mycoleptodiscus</i> sp.                                                                                                                                                                                                         | Magnaporthales    | 100%                                 | 0                                     | 0         | 0.013        | 0.035     | 0.038              | 0.118     | 0.025        | 0.031     |
| <i>Myrothecium</i> sp.                                                                                                                                                                                                             | Hypocreales       | 100%                                 | 0                                     | 0         | 0            | 0         | 0                  | 0.011     | 0            | 0         |
| Myxotrichaceae                                                                                                                                                                                                                     | Onygenales        | 100%                                 | 0                                     | 0         | 0            | 0         | 0                  | 0.021     | 0            | 0.006     |
| <i>Nakazawaea ernobii</i>                                                                                                                                                                                                          | Saccharomycetales | 99%                                  | 0.139                                 | 0         | 0            | 0         | 0                  | 0         | 0.321        | 0.037     |
| <i>Nectria cinnabarina</i>                                                                                                                                                                                                         | Hypocreales       | 99%                                  | 0                                     | 0         | 0            | 0         | 0                  | 0.011     | 0            | 0.012     |
| Nectriaceae                                                                                                                                                                                                                        | Hypocreales       | 99%                                  | 0.185                                 | 0         | 0.104        | 0.052     | 1.344              | 0         | 0.234        | 0.075     |
| <i>Neobulgaria pura</i> + <i>Neobulgaria</i> sp.                                                                                                                                                                                   | Helotiales        | 99–100%                              | 0.162                                 | 0         | 0.039        | 0         | 0                  | 0.054     | 0.024        | 0.019     |
| <i>Neofabraea</i> sp.                                                                                                                                                                                                              | Helotiales        | 99%                                  | 0                                     | 0         | 0.013        | 0.087     | 0.019              | 0         | 0            | 0.006     |
| <i>Nothojafnea cryptotricha</i>                                                                                                                                                                                                    | Pezizales         | 99%                                  | 0                                     | 0         | 0            | 0         | 0                  | 0.011     | 0            | 0         |
| <i>Otidodendron majus</i> + <i>O. periconioides</i>                                                                                                                                                                                | Incertae sedis    | 98–99%                               | 0                                     | 0         | 0            | 0.017     | 0                  | 0         | 0.185        | 0.019     |
| Onygenaceae                                                                                                                                                                                                                        | Onygenales        | 100%                                 | 0.023                                 | 0         | 0            | 0.052     | 0.038              | 0.064     | 0.012        | 0.025     |
| <i>Ophiostoma tsotsi</i>                                                                                                                                                                                                           | Ophiostomatales   | 99%                                  | 0                                     | 0         | 0            | 0.069     | 0                  | 0         | 0.012        | 0.012     |
| Ophiostomataceae                                                                                                                                                                                                                   | Ophiostomatales   | 99%                                  | 0                                     | 0         | 0            | 0.087     | 0                  | 0.011     | 1.122        | 0.006     |
| <i>Orbilia aprilis</i> + <i>O. aristata</i>                                                                                                                                                                                        | Orbiliales        | 99–100%                              | 0.023                                 | 0         | 0.482        | 0.156     | 0                  | 0.053     | 0.037        | 0         |
| Orbiliomycetes                                                                                                                                                                                                                     | Orbiliales        | 100%                                 | 0.023                                 | 0         | 0.326        | 0.052     | 0.038              | 0.054     | 0.062        | 0.031     |
| <i>Otidea subterranea</i>                                                                                                                                                                                                          | Pezizales         | 100%                                 | 0.278                                 | 0         | 0.078        | 0.069     | 0.057              | 0.097     | 0.222        | 0.112     |
| <i>Pannaria athroophylla</i>                                                                                                                                                                                                       | Peltigerales      | 99%                                  | 0                                     | 0         | 0            | 0.087     | 0                  | 0         | 0            | 0         |
| <i>Parmelia subdivaricata</i>                                                                                                                                                                                                      | Lecanorales       | 99%                                  | 0.023                                 | 0         | 0.039        | 0.017     | 0.019              | 0.043     | 0.012        | 0         |
| <i>Penicillium angulare</i> + <i>P. bialowiezense</i> + <i>P. cairnsense</i> + <i>P. citreonigrum</i> + <i>P. kongii</i> + <i>P. lanosum</i> + <i>P. lapidosum</i> + <i>P. miczynskii</i> + <i>P. raphiae</i> + <i>P. viticola</i> | Eurotiales        | 99–100%                              | 0.763                                 | 5.345     | 0.182        | 1.143     | 0.322              | 0.784     | 0.962        | 1.107     |
| <i>Petriella sordida</i>                                                                                                                                                                                                           | Microascales      | 99%                                  | 0.046                                 | 0         | 0            | 0         | 0                  | 0         | 0.025        | 0.025     |
| <i>Pezicula sporulosa</i>                                                                                                                                                                                                          | Helotiales        | 100%                                 | 0.116                                 | 0         | 0.078        | 0.191     | 0.265              | 0.032     | 0.567        | 0.056     |
| <i>Phacidium grevilleae</i>                                                                                                                                                                                                        | Phacidiales       | 100%                                 | 2.567                                 | 0         | 0.156        | 0.173     | 0.625              | 1.526     | 0.185        | 0.081     |
| <i>Phaeoacremonium hungaricum</i> + <i>P. occidentale</i>                                                                                                                                                                          | Togniniales       | 98–100%                              | 0                                     | 0         | 0.013        | 0         | 0.019              | 0         | 0.271        | 0         |
| <i>Phaeomollisia piceae</i>                                                                                                                                                                                                        | Helotiales        | 100%                                 | 0.139                                 | 0         | 0.274        | 0.035     | 0.17               | 0.032     | 0.21         | 0.068     |
| <i>Phaeomoniella</i> sp.                                                                                                                                                                                                           | Phaeomoniellales  | 99%                                  | 0.185                                 | 0         | 0.3          | 0.017     | 0                  | 0         | 0.16         | 0.05      |

| Taxon                                                                                                                      | Order             | Similarity of the reference sequence | Frequency in the fungal community (%) |           |              |           |                    |           |              |           |
|----------------------------------------------------------------------------------------------------------------------------|-------------------|--------------------------------------|---------------------------------------|-----------|--------------|-----------|--------------------|-----------|--------------|-----------|
|                                                                                                                            |                   |                                      | May stumps                            |           |              |           | July–August stumps |           |              |           |
|                                                                                                                            |                   |                                      | < 5 cm diam.                          |           | > 5 cm diam. |           | < 5 cm diam.       |           | > 5 cm diam. |           |
|                                                                                                                            |                   |                                      | Treated                               | Untreated | Treated      | Untreated | Treated            | Untreated | Treated      | Untreated |
| <i>Phialocephala compacta</i> + <i>P. fusca</i> . + <i>P. glacialis</i> + <i>P. scopiformis</i> + <i>Phialocephala</i> sp. | Helotiales        | 99-100%                              | 0.092                                 | 0.329     | 0.026        | 0.572     | 7.459              | 0.011     | 0.469        | 0.224     |
| <i>Phomatospora dinemasporium</i>                                                                                          | Incertae sedis    | 100%                                 | 0.185                                 | 0         | 0            | 0         | 0.076              | 0.032     | 0.049        | 0         |
| <i>Phomopsis pulla</i> (Sacc.)                                                                                             | Diaporthales      | 100%                                 | 0                                     | 0         | 0            | 0         | 0.246              | 0.075     | 0            | 0         |
| <i>Picoa juniperi</i>                                                                                                      | Pezizales         | 98%                                  | 0                                     | 0         | 0            | 0.676     | 0                  | 0         | 0            | 0.006     |
| <i>Plectania melastoma</i>                                                                                                 | Pezizales         | 99%                                  | 0                                     | 0         | 0            | 0         | 2.934              | 0.032     | 0.012        | 0         |
| <i>Pleurophoma ossicola</i>                                                                                                | Xylariales        | 99%                                  | 0.046                                 | 25.37     | 0.352        | 0.225     | 0.076              | 0.021     | 0.025        | 0.031     |
| <i>Proliferodiscus</i> sp.                                                                                                 | Helotiales        | 99%                                  | 0.185                                 | 0.411     | 0.261        | 14.751    | 0.341              | 0.828     | 1.48         | 5.636     |
| Pseudeurotiaceae                                                                                                           | Incertae sedis    | 97%                                  | 0                                     | 0         | 0            | 0.035     | 0                  | 0         | 0            | 0         |
| <i>Pseudogymnoascus verrucosus</i>                                                                                         | Incertae sedis    | 100%                                 | 0                                     | 0         | 0            | 0.451     | 0.057              | 0         | 0            | 0.006     |
| <i>Pseudovalsaria ferruginea</i>                                                                                           | Boliniales        | 100%                                 | 0                                     | 0         | 0            | 0         | 0                  | 0         | 0            | 0.821     |
| <i>Pyrenopeziza revincta</i>                                                                                               | Helotiales        | 100%                                 | 0.093                                 | 0         | 0            | 0         | 0.095              | 0         | 0            | 0         |
| <i>Pyrenula septicollaris</i>                                                                                              | Pyrenulales       | 100%                                 | 0                                     | 0         | 0            | 0         | 0                  | 0         | 0            | 0.012     |
| <i>Rhizoscyphus</i> sp.                                                                                                    | Helotiales        | 100%                                 | 0.023                                 | 0         | 0.222        | 1.317     | 0.019              | 0         | 0            | 0         |
| Saccharomycetales                                                                                                          | Saccharomycetales | 99%                                  | 0.093                                 | 0         | 0.013        | 0.26      | 0                  | 0.011     | 0.419        | 4.871     |
| <i>Sarea resiniae</i>                                                                                                      | Trapeliales       | 99%                                  | 0.116                                 | 0         | 0.013        | 0.069     | 0.114              | 0.107     | 0.037        | 0.006     |
| <i>Sarocladium strictum</i>                                                                                                | Incertae sedis    | 99%                                  | 0.046                                 | 0         | 0            | 0.711     | 0.038              | 0.107     | 2.01         | 0.156     |
| <i>Scheffersomyces ergatensis</i>                                                                                          | Saccharomycetales | 99%                                  | 0.37                                  | 0         | 0            | 0         | 0                  | 0         | 0            | 0         |
| Sordariales                                                                                                                | Sordariales       | 100%                                 | 0.023                                 | 0         | 0.143        | 0.017     | 0                  | 0         | 0            | 0         |
| Sordariomycetes                                                                                                            | Sordariales       | 98%                                  | 0.069                                 | 0.082     | 0.443        | 0.416     | 1.174              | 0.054     | 0.197        | 0.174     |
| <i>Sporothrix dimorphospora</i> + <i>S. pallida</i>                                                                        | Ophiostomatales   | 99–100%                              | 0                                     | 0         | 0            | 0.208     | 0.095              | 0         | 0.062        | 0.025     |
| <i>Stachybotrys</i> sp.                                                                                                    | Hypocreales       | 98%                                  | 0                                     | 0         | 0            | 0.26      | 0                  | 0         | 0.012        | 0         |
| <i>Talaromyces amestolkiae</i> + <i>T. verruculosus</i> + <i>T. wortmannii</i>                                             | Eurotiales        | 98–100%                              | 0                                     | 0.164     | 0            | 0.07      | 0                  | 0         | 0            | 0.012     |
| <i>Taphrina carnea</i> Johanson + <i>T. confusa</i>                                                                        | Taphrinales       | 99–100%                              | 0.185                                 | 0         | 0            | 0.035     | 0.057              | 0.032     | 0.012        | 0.025     |
| <i>Tetracladium setigerum</i>                                                                                              | Helotiales        | 99%                                  | 0                                     | 0         | 0            | 0         | 0                  | 0         | 0.012        | 0         |
| <i>Tolyposcladium</i> sp.                                                                                                  | Hypocreales       | 99%                                  | 0                                     | 0         | 0.013        | 0.087     | 0                  | 0.011     | 0.074        | 0.012     |
| <i>Trichoderma asperellum</i> + <i>T. bissettii</i> + <i>T. crassum</i> + <i>T. stellatum</i> + <i>T. theobromicola</i>    | Hypocreales       | 99–100%                              | 0.184                                 | 0.37      | 0.339        | 0         | 0.019              | 0.043     | 0.012        | 0         |
| <i>Tridentaria implicans</i>                                                                                               | Incertae sedis    | 99%                                  | 0                                     | 0         | 0.026        | 0.035     | 0                  | 0.021     | 0.012        | 0.019     |
| <i>Trimmatostroma cordae</i>                                                                                               | Helotiales        | 99%                                  | 0                                     | 0         | 0            | 0.017     | 0                  | 0.075     | 0            | 0         |
| <i>Truncatella restionacearum</i>                                                                                          | Xylariales        | 100%                                 | 0.023                                 | 0         | 0.078        | 0.087     | 0.038              | 0.032     | 0            | 0.012     |
| <i>Tumularia</i> sp.                                                                                                       | Incertae sedis    | 100%                                 | 0.069                                 | 0.082     | 0.195        | 2.236     | 0                  | 0.441     | 0.025        | 0.025     |
| Valsaceae                                                                                                                  | Diaporthales      | 100%                                 | 0.231                                 | 0.041     | 0.091        | 0.347     | 0.095              | 0         | 0.049        | 0         |
| <i>Valsaria lopadostomoides</i>                                                                                            | Incertae sedis    | 99%                                  | 0.023                                 | 0         | 0            | 0         | 0                  | 0         | 0.296        | 0.056     |

| Taxon                                                                                  | Order              | Similarity of the reference sequence | Frequency in the fungal community (%) |           |              |           |                    |           |              |           |
|----------------------------------------------------------------------------------------|--------------------|--------------------------------------|---------------------------------------|-----------|--------------|-----------|--------------------|-----------|--------------|-----------|
|                                                                                        |                    |                                      | May stumps                            |           |              |           | July–August stumps |           |              |           |
|                                                                                        |                    |                                      | < 5 cm diam.                          |           | > 5 cm diam. |           | < 5 cm diam.       |           | > 5 cm diam. |           |
|                                                                                        |                    |                                      | Treated                               | Untreated | Treated      | Untreated | Treated            | Untreated | Treated      | Untreated |
| <i>Venturia hystrioides</i> + <i>Venturia</i> sp.                                      | Venturiales        | 99–100%                              | 0.023                                 | 0         | 0.026        | 0.156     | 0                  | 0.011     | 0            | 0.025     |
| Venturiaceae                                                                           | Venturiales        | 99%                                  | 0                                     | 0         | 0            | 0.035     | 0.019              | 0.054     | 0.086        | 0         |
| Venturiales                                                                            | Venturiales        |                                      | 0.046                                 | 0         | 0.013        | 0.069     | 0                  | 0.011     | 0            | 0         |
| <i>Xenopolyscytalum pinea</i>                                                          | Helotiales         | 97%                                  | 0                                     | 0         | 0            | 0.017     | 0                  | 0.011     | 0            | 0         |
| Xylariaceae                                                                            | Xylariales         | 100%                                 | 0.023                                 | 0.082     | 0            | 0         | 0                  | 0.204     | 0            | 0         |
| <i>Yamadazyma mexicana</i>                                                             | Saccharomycetales  | 99%                                  | 0.116                                 | 0         | 0            | 0.052     | 0.019              | 0         | 0.345        | 0         |
| <i>Yarrowia lipolytica</i>                                                             | Saccharomycetales  | 99%                                  | 0.093                                 | 2.056     | 0            | 0         | 0.019              | 0         | 0            | 0         |
| <b>Basidiomycota</b>                                                                   |                    |                                      |                                       |           |              |           |                    |           |              |           |
| Agaricaceae                                                                            | Agaricales         | 100%                                 | 0.046                                 | 0.082     | 0.756        | 0.035     | 0.057              | 0.043     | 0.037        | 0.012     |
| Agaricales                                                                             |                    | 100%                                 | 2.845                                 | 0.164     | 0.052        | 0.052     | 2.385              | 2.311     | 1.196        | 0.398     |
| Agaricomycetes                                                                         |                    | 100%                                 | 0.069                                 | 0.041     | 0.013        | 0.017     | 0.019              | 0.032     | 0.999        | 0.691     |
| Agaricostilbales                                                                       |                    | 100%                                 | 0                                     | 0         | 0            | 0.017     | 0.114              | 0.064     | 0            | 0.006     |
| <i>Amanita parcivolvata</i>                                                            | Agaricales         | 100%                                 | 0                                     | 0         | 0.013        | 0.017     | 0.095              | 0.054     | 0.049        | 0.025     |
| <i>Amylocorticium molle</i>                                                            | Boletales          | 99%                                  | 0                                     | 0         | 0            | 0         | 0.587              | 0         | 0.025        | 0         |
| Auriculariales                                                                         |                    | 99%                                  | 0.023                                 | 0.041     | 0            | 0         | 0.019              | 1.666     | 0.012        | 0.019     |
| Basidiomycota                                                                          |                    | 99%                                  | 0.532                                 | 0.535     | 0.352        | 1.161     | 1.647              | 8.266     | 0.752        | 0.79      |
| <i>Bensingtonia</i> sp.                                                                | Agaricostilbales   | 100%                                 | 0.046                                 | 0         | 0            | 0         | 0                  | 0.011     | 0.049        | 0.019     |
| <i>Buckleyzyma aurantiaca</i> + <i>B. phyllomatis</i>                                  | Buckleyziales      | 98–100%                              | 0                                     | 0         | 0            | 0         | 0.019              | 0         | 0            | 0.006     |
| <i>Bullera melastomatis</i>                                                            | Tremellales        | 99–100%                              | 0.093                                 | 0         | 0            | 0.017     | 0                  | 0.086     | 0            | 0.006     |
| <i>Bulleromyces albus</i>                                                              | Tremellales        | 99%                                  | 0                                     | 0         | 0            | 0.017     | 0                  | 0.011     | 0            | 0.031     |
| Cantharellales                                                                         | Cantharellales     | 100%                                 | 0                                     | 0.082     | 0.013        | 0         | 0.114              | 0.032     | 0.321        | 0.006     |
| Ceratobasidiaceae                                                                      | Cantharellales     | 100%                                 | 0.023                                 | 0         | 0            | 0         | 0.644              | 0         | 0.025        | 0         |
| <i>Ceratobasidium</i>                                                                  | Cantharellales     | 100%                                 | 0.023                                 | 0         | 0            | 0         | 0.019              | 0         | 0.469        | 11.944    |
| <i>Cheimonophyllum roseum</i>                                                          | Agaricales         | 100%                                 | 0                                     | 0         | 0            | 0         | 0                  | 0         | 0.222        | 0         |
| <i>Chionosphaera cuniculicola</i>                                                      | Agaricostilbales   | 99%                                  | 0.948                                 | 0         | 0            | 0.017     | 0                  | 0         | 0.037        | 0         |
| Chrysozymaceae                                                                         |                    | 100%                                 | 0.023                                 | 0         | 0            | 0.017     | 0.322              | 0         | 0.21         | 0.012     |
| <i>Clavaria neonigrita</i>                                                             | Agaricales         | 99%                                  | 0                                     | 0         | 0            | 0         | 2.12               | 0         | 0            | 0         |
| <i>Clitopilus hobsonii</i>                                                             | Agaricales         | 99%                                  | 0                                     | 0         | 0            | 0.052     | 0                  | 0         | 0            | 0         |
| <i>Colacogloea peniophorae</i> + <i>C. philyla</i> + <i>Colacogloea</i> sp.            | Heterogastridiales | 99–100%                              | 2.036                                 | 0         | 0.065        | 0.139     | 0.246              | 0.054     | 4.18         | 0.062     |
| <i>Conocybe echinata</i>                                                               | Agaricales         | 100%                                 | 0                                     | 0         | 0            | 0         | 0.019              | 0         | 0            | 0         |
| <i>Corticium confine</i>                                                               | Corticiales        | 100%                                 | 0                                     | 0         | 0            | 0.017     | 0                  | 0         | 0            | 0         |
| <i>Cryptococcus pseudolongus</i> + <i>C. psychrotolerans</i> + <i>Cryptococcus</i> sp. | Tremellales        | 99–100%                              | 2.197                                 | 0.041     | 0.052        | 0.641     | 0.853              | 2.278     | 0.419        | 0.118     |
| <i>Cuniculitrema polymorpha</i>                                                        | Tremellales        | 98%                                  | 0.023                                 | 0         | 0            | 1.837     | 2.367              | 0         | 12.528       | 2.519     |
| <i>Curvibasidium cygneicollum</i>                                                      | Microbotryales     | 100%                                 | 0.162                                 | 0         | 0.678        | 1.612     | 0.454              | 0.14      | 0.086        | 0.199     |

| Taxon                                                                                            | Order               | Similarity of the reference sequence | Frequency in the fungal community (%) |           |              |           |                    |           |              |           |
|--------------------------------------------------------------------------------------------------|---------------------|--------------------------------------|---------------------------------------|-----------|--------------|-----------|--------------------|-----------|--------------|-----------|
|                                                                                                  |                     |                                      | May stumps                            |           |              |           | July–August stumps |           |              |           |
|                                                                                                  |                     |                                      | < 5 cm diam.                          |           | > 5 cm diam. |           | < 5 cm diam.       |           | > 5 cm diam. |           |
|                                                                                                  |                     |                                      | Treated                               | Untreated | Treated      | Untreated | Treated            | Untreated | Treated      | Untreated |
| Cystobasidiomycetes                                                                              |                     | 100%                                 | 0                                     | 0         | 0.169        | 0.069     | 0.076              | 0.032     | 0.012        | 0.037     |
| <i>Cystobasidium pinicola</i>                                                                    | Cystobasidiales     | 100%                                 | 0.301                                 | 0         | 0.13         | 0.537     | 0.133              | 0.161     | 0.444        | 0.485     |
| Cystofilobasidiales                                                                              | Cystofilobasidiales | 100%                                 | 0.046                                 | 0         | 0            | 0.173     | 0                  | 0.043     | 0            | 0.025     |
| <i>Cystofilobasidium infirmominiatum</i> + <i>C. macerans</i>                                    | Cystofilobasidiales | 99–100%                              | 0.069                                 | 0         | 0.013        | 0.069     | 0                  | 0.011     | 0.012        | 0.012     |
| <i>Dacrymyces chrysospermus</i>                                                                  | Dacrymycetales      | 99%                                  | 0                                     | 0         | 0            | 0.485     | 0                  | 0.032     | 0            | 0         |
| <i>Dioszegia changbaiensis</i> + <i>D. fristingensis</i>                                         | Tremellales         | 98–99%                               | 0                                     | 0         | 0.039        | 0.017     | 0                  | 0         | 0            | 0         |
| Erythrobasidiales                                                                                | Erythrobasidiales   | 100%                                 | 0.093                                 | 0         | 0            | 0.069     | 0.076              | 0.29      | 0.012        | 0.019     |
| <i>Erythrobasidium hasegawae</i> + <i>Erythrobasidium</i> sp.                                    | Erythrobasidiales   | 99–100%                              | 0.046                                 | 0         | 0.013        | 0.052     | 0.227              | 0.075     | 0.012        | 0.006     |
| <i>Exobasidium arescens</i> + <i>E. kishianum</i> + <i>E. maculosum</i> + <i>Exobasidium</i> sp. | Exobasidiales       | 99–100%                              | 0.069                                 | 0         | 0.039        | 0.624     | 0.038              | 0.129     | 0.974        | 0.062     |
| <i>Fellomyces</i> sp. + <i>F. borneensis</i> + <i>F. horovitziae</i> + <i>F. mexicanus</i>       | Tremellales         | 99–100%                              | 0.232                                 | 0         | 0.039        | 0.26      | 0.152              | 0.538     | 0.11         | 0.043     |
| <i>Fellozyma inositophila</i>                                                                    | Incertae sedis      | 99%                                  | 0.093                                 | 0         | 0.143        | 1.231     | 0.019              | 0.011     | 0.123        | 0.031     |
| <i>Fibulobasidium inconspicuum</i> + <i>F. murrhardtense</i>                                     | Tremellales         | 98–99%                               | 0.023                                 | 0         | 0.209        | 0.035     | 0.019              | 0         | 0            | 0.024     |
| <i>Filobasidium stepposum</i> + <i>F. wieringae</i>                                              | Filobasidiales      | 99–100%                              | 0.023                                 | 0         | 0.013        | 0.087     | 0                  | 0         | 0.049        | 0.019     |
| <i>Flammulina velutipes</i>                                                                      | Agaricales          | 100%                                 | 0                                     | 0         | 0            | 0         | 0                  | 0         | 0            | 0.062     |
| <i>Genolevuria amylyolytica</i> + <i>G. bromeliarum</i>                                          | Tremellales         | 99–100%                              | 0.046                                 | 0         | 0            | 0.017     | 0                  | 0.161     | 0            | 0.012     |
| <i>Hamamotoa lignophila</i>                                                                      | Incertae sedis      | 99%                                  | 0.023                                 | 0         | 0.039        | 1.04      | 0.057              | 0.011     | 0.567        | 1.033     |
| Hydnaceae                                                                                        | Cantharellales      | 100%                                 | 0                                     | 0.082     | 0            | 0         | 0                  | 0.011     | 0            | 0         |
| <i>Hygrocybe subceracea</i>                                                                      | Agaricales          | 100%                                 | 0                                     | 0         | 0            | 0         | 0.133              | 0.021     | 0            | 0         |
| Hygrophoraceae                                                                                   | Agaricales          | 100%                                 | 0                                     | 0.082     | 0            | 0.017     | 0                  | 0         | 0            | 0         |
| Hymenochaetales                                                                                  | Hymenochaetales     | 100%                                 | 0                                     | 0.123     | 0            | 0         | 0                  | 0         | 0            | 0         |
| <i>Hyphoderma setigerum</i>                                                                      | Polyporales         | 99%                                  | 0                                     | 0         | 0            | 0         | 0                  | 0         | 0            | 0.747     |
| <i>Hypholoma acutum</i>                                                                          | Agaricales          | 99%                                  | 0                                     | 0         | 0            | 0         | 0                  | 0         | 0            | 0.292     |
| <i>Inocybe</i> sp.                                                                               | Agaricales          | 100%                                 | 0                                     | 0         | 0            | 0.884     | 0                  | 0         | 0            | 0         |
| <i>Itersonilia pannonica</i> + <i>I. perplexans</i>                                              | Cystofilobasidiales | 99–100%                              | 0.023                                 | 0         | 0.026        | 0.156     | 0.076              | 0.215     | 0            | 0.037     |
| <i>Kockovaella machilophila</i>                                                                  | Tremellales         | 99%                                  | 0.046                                 | 0         | 0.117        | 0.676     | 0                  | 0.054     | 0.136        | 0.056     |
| <i>Kondoa aerea</i>                                                                              | Agaricostilbales    | 99%                                  | 0                                     | 0         | 0            | 0.017     | 0                  | 0.011     | 0            | 0.037     |
| <i>Krasilnikoozyma huempii</i>                                                                   | Cystofilobasidiales | 99%                                  | 0                                     | 0         | 0            | 0         | 0                  | 0         | 0.012        | 0.05      |
| <i>Kriegeria eriophori</i>                                                                       | Kriegeriales        | 99%                                  | 0                                     | 0         | 0            | 0.156     | 0                  | 0         | 0            | 0         |
| <i>Kurtzmanomyces</i> sp. + <i>K. insolitus</i> + <i>K. tardus</i>                               | Agaricostilbales    | 99–100%                              | 0.069                                 | 0         | 0.013        | 0.035     | 0.246              | 0.139     | 0.074        | 0         |
| <i>Kvoniella pini</i> + <i>K. shivajii</i>                                                       | Tremellales         | 98–99%                               | 0.162                                 | 0         | 0.039        | 0.139     | 0.114              | 0.29      | 0.049        | 0.012     |
| <i>Laetiporus sulphureus</i> + <i>Laetiporus</i> sp.                                             | Polyporales         | 99–100%                              | 0.023                                 | 0         | 0            | 3.727     | 0                  | 0         | 0.049        | 0.006     |
| <i>Leucogyrophana sororia</i>                                                                    | Boletales           | 99%                                  | 0                                     | 0         | 0            | 0         | 0                  | 0         | 0.086        | 0         |
| Leucosporidiales                                                                                 | Leucosporidiales    | 99%                                  | 0                                     | 0         | 0            | 0.017     | 0                  | 0         | 0            | 0         |
| <i>Leucosporidiella creatinivora</i>                                                             | Leucosporidiales    | 99%                                  | 0                                     | 0         | 0.013        | 0.139     | 0                  | 0         | 0.049        | 0         |

| Taxon                                                                                                                 | Order               | Similarity of the reference sequence | Frequency in the fungal community (%) |           |              |           |                    |           |              |           |
|-----------------------------------------------------------------------------------------------------------------------|---------------------|--------------------------------------|---------------------------------------|-----------|--------------|-----------|--------------------|-----------|--------------|-----------|
|                                                                                                                       |                     |                                      | May stumps                            |           |              |           | July–August stumps |           |              |           |
|                                                                                                                       |                     |                                      | < 5 cm diam.                          |           | > 5 cm diam. |           | < 5 cm diam.       |           | > 5 cm diam. |           |
|                                                                                                                       |                     |                                      | Treated                               | Untreated | Treated      | Untreated | Treated            | Untreated | Treated      | Untreated |
| <i>Leucosporidium</i> sp. + <i>L. drummii</i> + <i>L. fasciculatum</i>                                                | Leucosporidiales    | 99–100%                              | 0                                     | 0         | 0.404        | 0.417     | 0.019              | 0.011     | 0.012        | 0.143     |
| <i>Luellia recondita</i>                                                                                              | Trechisporales      | 100%                                 | 0                                     | 0         | 0            | 0.121     | 0.038              | 0.129     | 0            | 0         |
| <i>Malassezia globosa</i> + <i>M. restricta</i>                                                                       | Incertae sedis      | 98–100%                              | 0                                     | 0.37      | 0.013        | 0         | 0                  | 0         | 0.012        | 0         |
| <i>Mastigobasidium intermedium</i>                                                                                    | Leucosporidiales    | 100%                                 | 0                                     | 0         | 0            | 0.017     | 0                  | 0         | 0            | 0         |
| <i>Microbotryomycetes</i> sp.                                                                                         |                     | 100%                                 | 0.208                                 | 0         | 0.3          | 0.485     | 0.606              | 0.183     | 0.875        | 18.681    |
| <i>Microsporomyces pini</i>                                                                                           | Incertae sedis      | 100%                                 | 0.046                                 | 0         | 0.104        | 0.104     | 0                  | 0.021     | 0.012        | 0.062     |
| <i>Microstroma album</i>                                                                                              | Microstromatales    | 100%                                 | 0                                     | 0.329     | 0.013        | 0.087     | 0.019              | 0.021     | 0.074        | 0.031     |
| <i>Mrakia frigida</i>                                                                                                 | Cystofilobasidiales | 100%                                 | 0                                     | 0         | 0            | 0.017     | 0.076              | 0         | 0.037        | 0         |
| <i>Mycena cinerella</i> + <i>M. galericulata</i> + <i>M. megaspora</i> + <i>M. sanguinolenta</i> + <i>M. zephirus</i> | Agaricales          | 99–100%                              | 0.069                                 | 6.086     | 0.013        | 0.155     | 0                  | 13.866    | 0            | 0.112     |
| <i>Naganishia cerealis</i>                                                                                            | Filobasidiales      | 98%                                  | 0.046                                 | 0         | 0            | 0         | 0                  | 0         | 0.062        | 0         |
| <i>Oberwinklerozyma yarrowii</i>                                                                                      | Incertae sedis      | 99%                                  | 0                                     | 0         | 0            | 0.017     | 0                  | 0.011     | 0.025        | 0.006     |
| <i>Papiliotrema pernicioso</i>                                                                                        | Tremellales         | 99%                                  | 0                                     | 0         | 0            | 0.121     | 0                  | 0.398     | 0.025        | 0.373     |
| <i>Peniophora erikssonii</i> + <i>P. pini</i>                                                                         | Russulales          | 99–100%                              | 0                                     | 0         | 0.013        | 0.017     | 0.019              | 0         | 0.074        | 0         |
| <i>Phaeotremella skimmeri</i>                                                                                         | Tremellales         | 99%                                  | 0                                     | 0         | 0            | 0.017     | 0.019              | 0         | 0.049        | 0.056     |
| <i>Phanerochaete velutina</i>                                                                                         | Polyporales         | 99%                                  | 0.254                                 | 0         | 0            | 0         | 0.019              | 0         | 0            | 0         |
| Polyporales                                                                                                           | Polyporales         | 100%                                 | 1.018                                 | 0         | 0.052        | 0         | 0.019              | 0.021     | 0            | 0.019     |
| <i>Postia rennyi</i>                                                                                                  | Polyporales         | 100%                                 | 0                                     | 0         | 0            | 0         | 0                  | 0         | 0            | 1.344     |
| <i>Pseudomicrostroma phylloplanum</i>                                                                                 | Microstromatales    | 99%                                  | 0                                     | 0         | 0            | 0         | 0                  | 0.043     | 0.012        | 0.106     |
| <i>Pseudotremella moriformis</i>                                                                                      | Tremellales         | 99%                                  | 0                                     | 0         | 0            | 0         | 0                  | 0.064     | 0            | 0         |
| <i>Resinicium bicolor</i>                                                                                             | Hymenochaetales     | 100%                                 | 0.162                                 | 0         | 0            | 0         | 0.019              | 0         | 0            | 1.238     |
| <i>Rhodocybe</i> sp.                                                                                                  | Agaricales          | 100%                                 | 0.093                                 | 0         | 0            | 0         | 0.038              | 0.021     | 0.012        | 0         |
| <i>Rhodotorula glutinis</i> + <i>R. nothofagi</i> + <i>Rhodotorula</i> sp.                                            | Sporidiobolales     | 99–100%                              | 0.346                                 | 0         | 0.234        | 0.329     | 0.303              | 0.042     | 0.641        | 0.149     |
| Russulaceae                                                                                                           | Russulales          | 100%                                 | 0                                     | 0         | 0.013        | 0         | 0                  | 0         | 0            | 0         |
| Russulales                                                                                                            | Russulales          | 100%                                 | 0                                     | 0.041     | 0            | 0.017     | 0                  | 0.011     | 0.271        | 0.044     |
| <i>Schizophyllum</i> sp.                                                                                              | Agaricales          | 100%                                 | 0                                     | 0         | 0.235        | 0.017     | 3.256              | 0         | 0.321        | 0         |
| Sebacinales                                                                                                           | Sebacinales         | 100%                                 | 0.254                                 | 0         | 0.56         | 0         | 10.356             | 0.215     | 0.049        | 0         |
| <i>Septobasidium broussonetiae</i> + <i>S. pallidum</i>                                                               | Septobasidiales     | 99–100%                              | 0.116                                 | 0         | 0            | 0.138     | 0.152              | 0.075     | 0.259        | 0.018     |
| <i>Sistotrema brinkmannii</i>                                                                                         | Cantharellales      | 100%                                 | 0.046                                 | 0         | 0.013        | 0         | 0                  | 0.043     | 11.332       | 5.064     |
| <i>Slooffia pilatii</i> + <i>S. tsugae</i>                                                                            | Incertae sedis      | 99–100%                              | 0.069                                 | 0         | 0.026        | 0.035     | 0                  | 0         | 0            | 0.044     |
| Sporidiobolales                                                                                                       | Sporidiobolales     | 99%                                  | 0.162                                 | 0         | 0.091        | 0.156     | 0.625              | 0.236     | 0.358        | 0.012     |
| <i>Sporobolomyces</i> sp. + <i>S. symmetricus</i>                                                                     | Sporidiobolales     | 99–100%                              | 0.023                                 | 0         | 0            | 0         | 0.246              | 0         | 0.086        | 0         |
| <i>Stereum hirsutum</i> + <i>S. rugosum</i>                                                                           | Russulales          | 99–100%                              | 0.532                                 | 0         | 0            | 0.034     | 0                  | 0         | 0.123        | 0.087     |
| <i>Symmetrospora foliicola</i> + <i>S. gracilis</i> + <i>Symmetrospora</i> sp.                                        | Incertae sedis      | 99–100%                              | 0.046                                 | 0         | 0            | 0         | 0.284              | 0.14      | 0.061        | 0.012     |



| Taxon                                                                          | Order               | Similarity of the reference sequence | Frequency in the fungal community (%) |           |              |           |                    |           |              |           |
|--------------------------------------------------------------------------------|---------------------|--------------------------------------|---------------------------------------|-----------|--------------|-----------|--------------------|-----------|--------------|-----------|
|                                                                                |                     |                                      | May stumps                            |           |              |           | July–August stumps |           |              |           |
|                                                                                |                     |                                      | < 5 cm diam.                          |           | > 5 cm diam. |           | < 5 cm diam.       |           | > 5 cm diam. |           |
|                                                                                |                     |                                      | Treated                               | Untreated | Treated      | Untreated | Treated            | Untreated | Treated      | Untreated |
| <i>Tausonia pullulans</i>                                                      | Cystofilobasidiales | 99%                                  | 0                                     | 0         | 0            | 0.624     | 0                  | 0.021     | 0.025        | 0         |
| Thelephorales                                                                  | Thelephorales       | 100%                                 | 0                                     | 0         | 0.026        | 0.035     | 0                  | 0         | 0.037        | 0         |
| <i>Tremella</i> sp. + <i>T. globispora</i> + <i>T. indecorata</i>              | Tremellales         | 98–99%                               | 0.254                                 | 0         | 0            | 0.416     | 0.341              | 0.032     | 0.062        | 0.012     |
| Tremellales                                                                    | Tremellales         | 99%                                  | 0.116                                 | 0         | 0.078        | 0.659     | 0.133              | 0.623     | 0.308        | 0.249     |
| <i>Tremellomyces</i> sp.                                                       | Tremellales         | 99%                                  | 0.278                                 | 0         | 0.013        | 1.179     | 0.114              | 0.473     | 0.308        | 0.336     |
| <i>Trichosporon otae</i> + <i>Trichosporon</i> sp.                             | Tremellales         | 99–100%                              | 0.138                                 | 3.248     | 0            | 0         | 0.019              | 0.021     | 0.024        | 0.074     |
| <i>Tulasnella</i> sp.                                                          | Cantharellales      | 99%                                  | 0.023                                 | 0.329     | 0            | 0         | 0                  | 0         | 0            | 0         |
| <i>Vishniacozyma carnescens</i> + <i>V. globispora</i> + <i>V. victoriae</i> . | Tremellales         | 99%                                  | 0.023                                 | 0.082     | 0            | 0.208     | 0.019              | 0.247     | 0.037        | 0.049     |
| <i>Vonarxula javanica</i>                                                      | Incertae sedis      | 99%                                  | 0                                     | 0         | 0.052        | 0.087     | 0.019              | 0         | 0.049        | 0         |
| <i>Xylodon raduloides</i>                                                      | Hymenochaetales     | 97%                                  | 0                                     | 0         | 0            | 0         | 0                  | 0         | 0.086        | 0         |
| <i>Yunzhangia auriculariae</i>                                                 | Incertae sedis      | 100%                                 | 0                                     | 0         | 0            | 0.017     | 0                  | 0         | 0            | 0.019     |
| <b>Other taxa</b>                                                              |                     |                                      | 3.96                                  | 0.58      | 13.38        | 2.53      | 4.77               | 2.57      | 3.61         | 2.65      |
| <b>Non-cultured fungi</b>                                                      |                     |                                      | 3.65                                  | 12.75     | 21.0         | 5.81      | 21.75              | 3.16      | 4.86         | 2.45      |
| <b>Organisms without reference sequences in NCBI</b>                           |                     |                                      | 3.01                                  | 19.2      | 5.49         | 12.98     | 4.07               | 1.65      | 2.96         | 1.24      |
| Margalef's diversity index — $D_{Mg}$                                          |                     |                                      | 33.92                                 | 15.26     | 26.94        | 34.98     | 31.05              | 31.29     | 35.32        | 31.49     |
| Shannon's diversity index — $H'$                                               |                     |                                      | 2.59                                  | 2.47      | 2.55         | 3.55      | 3.39               | 3.34      | 3.38         | 3.31      |
| Simpson's diversity index — $D$                                                |                     |                                      | 0.45                                  | 0.51      | 0.46         | 0.62      | 0.60               | 0.59      | 0.58         | 0.57      |
| Shannon's evenness index — $E$                                                 |                     |                                      | 0.28                                  | 0.14      | 0.18         | 0.07      | 0.07               | 0.07      | 0.08         | 0.07      |
| Berger–Parker's dominance index — $d$                                          |                     |                                      | 0.52                                  | 0.25      | 0.35         | 0.16      | 0.21               | 0.17      | 0.22         | 0.18      |

Percentage of frequency

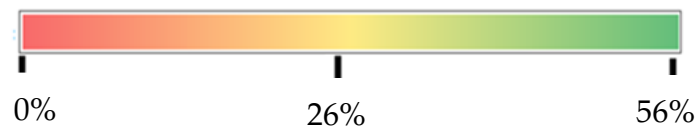

Supplement: plants-09-01126-s001.pdf [file plants-09-01126-s001.pdf]
